# Supplementary material for: A Desktop Assessment of Ozone Micro-Nanobubble Technology for Algae and PFAS Removal from Surface Water Bodies Using Open-Source Water Quality Data
Source: MDPI journal article supplement (doi:10.3390/su16020668), 2024-01-12
Supplement: s1 [file s1]

# A desktop assessment of ozone micro-nanobubble technology for algae and PFAS removal from surface water bodies using opensource water quality data

Soheil Aber, Rachele Aguada, Randimal Marasinghe, Christopher W. K. Chow \*, Raufdeen Rameezdeen and Ke Xing

Sustainable Infrastructure and Resource Management (SIRM), UniSA STEM, University of South Australia, Mawson Lakes, SA 5095, Australia; soheil.aber@unisa.edu.au (S.A.); agurs001@mymail.unisa.edu.au (R.A.); marrd006@mymail.unisa.edu.au (R.M.); rameez.rameezdeen@unisa.edu.au (R.R.); ke.xing@unisa.edu.au (K.X.)

\* Correspondence: christopher.chow@unisa.edu.au; Tel.: +61-8-830-23670

**Table S1:** Laboratory or on-site studies conducted using ozonation for algae treatment in surface water entities.

| Source/Article | Used Technology                       | location                                 | Max reduction achieved            | Water quality                                                  | Remarks                                                                                                                                                                                                                                                                                                                                                   |
|----------------|---------------------------------------|------------------------------------------|-----------------------------------|----------------------------------------------------------------|-----------------------------------------------------------------------------------------------------------------------------------------------------------------------------------------------------------------------------------------------------------------------------------------------------------------------------------------------------------|
| [1]            | Ozone and permanganate as preoxidants | Cheng Ching Lake, Taiwan (Lab test)      | 93% removal of algae              | Temperature 16.6 – 31.3 °C<br>pH 7.9 – 8.7<br>DO 5.7 – 11 mg/L | <ul style="list-style-type: none"> <li>1-7 mg/L of ozone</li> <li>The removal rate was 93% using 3 mg/L . A further increase of ozone reduced the reduction level due to the cell lysis releasing cyanotoxins</li> <li>Ozone used as a preoxidant helped coagulation, the addition of calcium further helped the removal when using alum doses</li> </ul> |
| [2]            | Ozonation                             | Reservoirs in South Australia (Lab test) | 100% reduction of two cyanotoxins | pH 7.1 – 7.8<br>DOC 4.6 – 15.5 mg/L                            | <ul style="list-style-type: none"> <li>There is no one-glove suits all solution, and the reduction is based on a conglomerate of the water qualities. Although lab tests show 100% reduction, this may not hold true in the field due to changing parameters</li> </ul>                                                                                   |

|     |                                                                       |                                             |                        |                                    |                                                                                                                                                                                                                                                                                                              |
|-----|-----------------------------------------------------------------------|---------------------------------------------|------------------------|------------------------------------|--------------------------------------------------------------------------------------------------------------------------------------------------------------------------------------------------------------------------------------------------------------------------------------------------------------|
| [3] | Activated carbon catalysed ozonation (ACCO)                           | A drinking water reservoir, Iran (Lab test) | 92.6% removal of algae | pH 8.5<br>DOC 1.9 mg/L             | <ul style="list-style-type: none"> <li>ACCO showed a 90% reduction in algae which is less than using ozone alone, however, using ACCO decreased the turbidity compared to ozonation, and whilst ozonation increased DOC, ACCO decreased DOC by 76%</li> </ul>                                                |
| [4] | Coagulation, ultrafiltration, ozone and biologically activated carbon | East Taihu Lake, China (On-site)            | 95.9% of algae removed | pH 7.9                             | <ul style="list-style-type: none"> <li>Total nitrogen was reduced by 81%</li> <li>DBP were formed during coagulation, however, the integrated process removed the DBP</li> </ul>                                                                                                                             |
| [5] | Ozone assisted biological filtration                                  | Saskatchewan, Canada (On-site)              | 96% removal of algae   | pH 7.9 – 9.2<br>DOC 12 – 35.6 mg/L | <ul style="list-style-type: none"> <li>The water was treated for the potable use of two rural communities</li> <li>High alkalinity inhibited the reduction of DOC using ozone</li> <li>Despite the two surface water sources having similar qualities, the treatment methods need to be different</li> </ul> |

**Table S2:** Laboratory or on-site studies conducted using ozonation for PFAS treatment in surface water entities.

| Source/<br>Article | Used Technology                                                                         | Location                                   | Reduction                                                                                               | Water<br>properties                    | Remarks                                                                                                                                                                                            |
|--------------------|-----------------------------------------------------------------------------------------|--------------------------------------------|---------------------------------------------------------------------------------------------------------|----------------------------------------|----------------------------------------------------------------------------------------------------------------------------------------------------------------------------------------------------|
| [6]                | Activated carbon, filtration, and ozonation                                             | South East Queensland, Australia           | Complete removal of PFOS and other long-chain PFAS.<br><br>Short-chain PFOS were not completely removed | Dry climate<br>pH 4                    | <ul style="list-style-type: none"> <li>Several stages of ozonation were applied ranging from 2 – 5 mg L<sup>-1</sup></li> <li>PFBS, PFHxS, PFOS, PFHxA, PFOA, PFNA, PFDA, PFHpA</li> </ul>         |
| [7]                | Alkaline ozonation                                                                      | Science Park of Hsinchu City, Taiwan       | Removal of PFOA and PFOS by 85%-100%                                                                    | Windy weather<br><br>pH 11             | <ul style="list-style-type: none"> <li>Ozone concentration of 0.3 mgL<sup>-1</sup></li> </ul>                                                                                                      |
| [8]                | <ul style="list-style-type: none"> <li>Ozone fractionation</li> <li>UV/ozone</li> </ul> | Laboratory                                 | Up to 95% of PFAS removal using ozone fractionation.<br><br>73% removal rate of PFAS using UV/ozone     | Room temperature                       | <ul style="list-style-type: none"> <li>Hydraulic residence time of 20 mins</li> <li>Air flow rate of 20 L min<sup>-1</sup></li> <li>PFHxS, PFOS, PFHxA, PFOA; PFPeS, PFHpS, PFPeA, PFAS</li> </ul> |
| [9]                | Catalyzed ozonation with persulfate                                                     | Laboratory in Stockholm University, Sweden | 77% removal of PFAS in laboratory-scale trials.                                                         | Room temperature (22 °C)<br><br>pH 7.5 | <ul style="list-style-type: none"> <li>Laboratory and pilot-scale experiments</li> <li>300 mg of ozone per hour</li> <li>187 mg ammonium persulfate</li> </ul>                                     |

---

|  |                                                         |                                                                                                                |
|--|---------------------------------------------------------|----------------------------------------------------------------------------------------------------------------|
|  | A maximum of 70% removal of PFAS in pilot-scale trials. | <ul style="list-style-type: none"><li>• PFOA, PFNA, PFDA, PFUnDA, PFOS, FOSA, PFPeA, PFHxA and PFHpA</li></ul> |
|--|---------------------------------------------------------|----------------------------------------------------------------------------------------------------------------|

---

**Table S3:** Laboratory or on-site studies conducted using ozonation and/or MNBT for algae treatment in surface water entities.

| Source/Article | Used Technology      | location                                  | Max reduction achieved          | Water quality                                                               | Remarks                                                                                                                                                                                                                                                                                                                                                              |
|----------------|----------------------|-------------------------------------------|---------------------------------|-----------------------------------------------------------------------------|----------------------------------------------------------------------------------------------------------------------------------------------------------------------------------------------------------------------------------------------------------------------------------------------------------------------------------------------------------------------|
| [10]           | MNTB + ozone         | Hong Kong (Lab testing)                   | 96%                             | Temperature 18.5 - 24.1 °C                                                  | <ul style="list-style-type: none"> <li>• Treatment carried for three days out of four</li> <li>• 65% reduction just after 0.025 ppm ozone treatment, and increased to 75% within 24 hours.</li> <li>• 96% reduction after 0.15 ppm treatment for a further two days using NTB.</li> <li>• Algal concentration was only in the magnitude of 10<sup>3</sup></li> </ul> |
| [11]           | NBT + O <sub>3</sub> | Wisconsin, USA (Lab testing)              | 100% algae mortality rate       | Temperature 15 – 28 °C<br>pH 6.5 - 9<br>EC 120 – 170 µS/cm<br>DO 4 –12 mg/L | <ul style="list-style-type: none"> <li>• There was an increase in the temperature by about 1 -1.5 °C after a four-hour treatment</li> </ul>                                                                                                                                                                                                                          |
| [12]           | NBT + O <sub>2</sub> | Naples, Florida, USA (On-site)            | DO increased by 41%             | Temperature 26 – 32 °C                                                      | <ul style="list-style-type: none"> <li>• Treatment duration was 8 weeks</li> <li>• Pond Volume was 9500 m<sup>3</sup></li> </ul>                                                                                                                                                                                                                                     |
| [13]           | NBT + O <sub>2</sub> | Vero Beach Golf Course, Florida (On-site) | DO increased from 1 to 8 mg/L   | Temperature 26 – 32 °C                                                      | <ul style="list-style-type: none"> <li>• Treatment lasted for 3 months</li> <li>• Pond Volume was 123,348 m<sup>3</sup></li> </ul>                                                                                                                                                                                                                                   |
| [14]           | NBT + O <sub>2</sub> | Emirates Golf Club, Dubai, UAE (On-site)  | DO increased from 4 to 6.1 mg/L | DO 4 mg/L                                                                   | <ul style="list-style-type: none"> <li>• Volume 15,000 m<sup>3</sup></li> <li>• Treatment for 3 months</li> <li>• Recirculating flowrate of 6 m<sup>3</sup>/h</li> </ul>                                                                                                                                                                                             |

|      |                                                                   |                                                    |                                                          |                                               |                                                                                                                                                                                                                                                                                                                    |
|------|-------------------------------------------------------------------|----------------------------------------------------|----------------------------------------------------------|-----------------------------------------------|--------------------------------------------------------------------------------------------------------------------------------------------------------------------------------------------------------------------------------------------------------------------------------------------------------------------|
| [15] | Chitosan modified NB                                              | Wangsong reservoir, South Korea (Lab testing)      | Algal cell inactivation rate was 75% for the modified NB | pH 7.6                                        | <ul style="list-style-type: none"> <li>The modified NBs produced more hydroxyl radicals than the NBs alone. The modified NBs were larger in size but had a lower concentration.</li> <li>NBs and <i>M.aeruginosa</i> have negative zeta potential whilst the chitosan NB have a positive zeta potential</li> </ul> |
| [16] | Modified local soil using chitosan and oxygen NB-modified zeolite | Cetian Reservoir, Shanxi province, China (On-site) | 75% of algal cells removed                               | pH 8.9<br>DO 5.9                              | <ul style="list-style-type: none"> <li>The project was carried out for a span of 3 years</li> </ul>                                                                                                                                                                                                                |
| [17] | Ozone micro-bombs                                                 | Shangtang River, Hangzhou, China (Lab testing)     | Over 93.2 % of Microcystis aeruginosa cells              | $6.7 \times 10^5 - 9.88 \times 10^6$ cells/mL | <ul style="list-style-type: none"> <li>MB filled with ozone and with an aluminium surface</li> <li>Reduction was observed within 5 minutes</li> <li>Removal of cyanotoxins occurred during lysis by 66.1% - 98.4% depending on intra or extracellularly</li> </ul>                                                 |

#### Reference:

- Chen, J.-J.; Yeh, H.-H.; Tseng, I.C. Effect of Ozone and Permanganate on Algae Coagulation Removal – Pilot and Bench Scale Tests. *Chemosphere* **2009**, *74*, 840–846.
- Rositano, J.; Newcombe, G.; Nicholson, B.; Sztajnbock, P. Ozonation of Nom and Algal Toxins in Four Treated Waters. *Water Research* **2001**, *35*, 23–32.
- Mousavi, S.M.S.; Dehghanzadeh, R.; Ebrahimi, S.M. Comparative Analysis of Ozonation (O<sub>3</sub>) and Activated Carbon Catalyzed Ozonation (ACCO) for Destroying Chlorophyll a and Reducing Dissolved Organic Carbon from a Eutrophic Water Reservoir. *Chemical Engineering Journal* **2017**, *314*, 396–405.

4. Xu, P.; Chen, Y.; Gui, B.; Guo, X.; Zhang, J. Pilot Study on the Treatment of Lake Water with Algae by Ultrafiltration–Ozone–Biologically Activated Carbon, AQUA - Water Infrastructure. *Ecosystems and Society* **2021**, *70*, 1192–1203.
5. Zanicic, E.; Stavrinides, J.; McMartin, D.W. Field-Analysis of Potable Water Quality and Ozone Efficiency in Ozone-Assisted Biological Filtration Systems for Surface Water Treatment. *Water Res* **2016**, *104*, 397–407.
6. Thompson, J.; Eaglesham, G.; Reungoat, J.; Poussade, Y.; Bartkow, M.; Lawrence, M.; Mueller, J.F. Removal of PFOS, PFOA and Other Perfluoroalkyl Acids at Water Reclamation Plants in South East Queensland Australia. *Chemosphere* **2011**, *82*, 9–17.
7. Lin, A.Y.C.; Panchangam, S.C.; Chang, C.H.; Hong, P.K.A.; Hsueh, H.F. Removal of Perfluorooctanoic Acid and Perfluooctance Sulfonate via Ozonation under Alkaline Condition". *Journal of Hazardous Materials* **2012**, *243*, 272–277.
8. Dai, X.; Xie, Z.; Dorian, B.; Gray, S.; Zhang, J. Comparative Study of PFAS Treatment by UV, UV/Ozone, and Fractionations with Air and Ozonated Air. *Environmental Science: Water Research & Technology* **2019**, *5*, 1897–1907.
9. Franke, V.; Schäfers, M.D.; Lindberg, J.J.; Ahrens, L. Removal of Per- and Polyfluoroalkyl Substances (PFASs) from Tap Water Using Heterogeneously Catalyzed Ozonation. *Environmental Science: Water Research & Technology* **2019**, *5*, 1887–1896.
10. Ng, P.H.; Huang, Q.; Huang, L.; Cheng, T.H.; Man, K.Y.; Cheng, K.P.; Rita, P.M.A.; Zhang, J.; St-Hilaire, S. Assessment of Ozone Nanobubble Technology to Reduce Freshwater Algae. *Aquaculture research* **2023**, *2023*, 9539102.
11. Anders, O.; Beesley, K.; Fanberg, L.; Frie, A.; Markee, T.; Schaefer, H.; Polkinghorne, C.; Prihoda, K.; Saillard, H.; TenEyck, M. Tests of the Nano Bubble Ozone Technology (2.5 Hp Unit). *NBOT 2.5 HP Report* **2020**.
12. Moleaer, 2018, Solitude Lake Management for a 1.3 Acre Pond, Naples, Florida. Available online: <https://www.moleaer.com>.
13. Moleaer, 2018, Nanobubbles naturally oxygenate and oxidize algae blooms at private golf club. Available online: <https://www.moleaer.com>.
14. Kalogerakis, N.; Kalogerakis, G.C.; Botha, Q.P. Environmental Applications of Nanobubble Technology: Field Testing at Industrial Scale. *The Canadian Journal of Chemical Engineering* **2021**, *99*, 2345–2354.
15. Nam, G.; Mohamed, M.M.; Jung, J. Novel Treatment of Microcystis Aeruginosa Using Chitosan-Modified Nanobubbles. *Environmental pollution* **2022**, *292*, 118458–58.
16. Pan, G.; Miao, X.; Bi, L.; Zhang, H.; Wang, L.; Wang, L.; Wang, Z.; Chen, J.; Ali, J.; Pan, M.; et al. Modified Local Soil (MLS) Technology for Harmful Algal Bloom Control, Sediment Remediation, and Ecological Restoration. *Water* **2019**, *11*, 1123.
17. Zhang, M.; Wang, Y.; Wu, X.; Kang, Z.; Zhang, D.; Pan, X. Potential of Ozone Micro-Bombs in Simultaneously Fast Removing Bloom-Forming Cyanobacteria and in Situ Degrading Microcystins. *Chemical Engineering Journal* **2021**, *407*, 127186.
